# Supplementary material for: System-Level Insights into Yeast Metabolism by Thermodynamic Analysis of Elementary Flux Modes
Source: PLOS journal article supplement (doi:10.1371/journal.pcbi.1002415), 2012-03-01
Supplement: S5 (10.1371/journal.pcbi.1002415.s005) [file journal.pcbi.1002415.s005]

301 Moved Permanently

# Moved Permanently

The document has moved here.

---

Apache Server at www.ploscompbiol.org Port 80
